# Computational Analysis of Dynamic Allostery and Control in the SARS-CoV-2 Main Protease

Igors Dubanevics<sup>a,b,1</sup> and Tom C.B. McLeish<sup>b,2,\*</sup>

<sup>a</sup>School of Natural Sciences, University of York, UK; <sup>b</sup>Department of Physics, University of York, UK;

\*Corresponding author. E-mail: tom.mcleish@york.ac.uk

## 1 Abstract

2 The COVID-19 pandemic caused by the novel coronavirus SARS-CoV-2 has generated a global  
3 pandemic and no vaccine or antiviral drugs exist at the moment of writing. An attractive  
4 coronavirus drug target is the main protease (M<sup>Pro</sup>, also known as 3CL<sup>Pro</sup>) because of its vital  
5 role in the viral cycle. A significant body of work has been focused on finding inhibitors  
6 which bind and block the active site of the main protease, but little has been done to address  
7 potential non-competitive inhibition which targets regions beyond the active site, partly be-  
8 cause the fundamental biophysics of such allosteric control is still poorly understood. In this  
9 work, we construct an Elastic Network Model (ENM) of the SARS-CoV-2 M<sup>Pro</sup> homodimer pro-  
10 tein and analyse the dynamics and thermodynamics of the main protease's ENM. We found a  
11 rich and heterogeneous dynamical structure in the correlated motions, including allosterically  
12 correlated motions between the homodimeric protease's active sites. Exhaustive 1-point and  
13 2-point mutation scans of the ENM and their effect on fluctuation free energies confirm pre-  
14 viously experimentally identified bioactive residues, but also suggest several new candidate  
15 regions that are distant from the active site for control of the protease function. Our results  
16 suggest new dynamically-driven control regions as possible candidates for non-competitive  
17 inhibiting binding sites in the protease, which may assist the development of current fragment-  
18 based binding screens. The results also provide new insight into the protein physics of fluctu-  
19 ation allostery and its underpinning dynamical structure.

## 1 1. Introduction

2 In 2019, a rapidly spreading disease named COVID-19 caused by the novel coronavirus SARS-CoV-2,  
3 has since generated a global pandemic. Preventive measures have been taken by a majority of  
4 countries, but no vaccine or anti-viral drugs exist, at the time of writing, although candidates are  
5 under trial. In the longer term, the identification of all potential inhibitor sites at all points of the  
6 viral life-cycle is of interest. Here we focus on the low-frequency dynamical structure of the virus'  
7 main protease, an important molecular machine in the viral cycle, and identify critical residues in its  
8 allosteric control. The work is informative for inhibitor design by identifying control regions of the  
9 protein that are distant from, rather than proximal to, its active sites. Allosteric mechanisms for  
10 distant control of binding and activation fall into two main classes: those which invoke significant  
11 conformational change (the original scenario of Monod, Wyman and Changeaux (1), and mechanisms  
12 that invoke the modification of thermal (entropic) fluctuations about a fixed, mean conformation  
13 (2–5). Such 'fluctuation allostery' recruits mostly global, low-frequency modes of internal protein  
14 motion, which are well-captured by correspondingly coarse-grained mechanical representations of  
15 the protein (6, 7). One effective tool at this level is the Elastic Network Model (ENM) (8). The

16 ENM resolves protein structure at the level of alpha-carbon sites only, which are represented as  
17 nodes connected by harmonic springs within a fixed cut-off radius from each other. Local point  
18 mutation can be modelled by changing the moduli of springs attached to the corresponding residue,  
19 and effector-binding by the addition of nodes and local harmonic potentials. The most significant  
20 contributions to the correlated dynamics of distant residues, and to the entropy of fluctuation come  
21 from global modes, whose ENM approximation allows straightforward calculation. This approach  
22 was successfully used to identify candidate control residues whose mutation may control allostery of  
23 effector binding in the homodimer transcription factor CAP (9). This study, and others, have shown  
24 that, while the huge reduction in the number of degrees of freedom that the ENM constitutes, does  
25 not capture the quantitative values of free energies, or their changes on mutation that are seen in  
26 experiment, it can identify the qualitative nature of the thermal dynamics of a protein. Furthermore,  
27 its coarse-graining can determine which residues present as candidates for allosteric control through  
28 mutation. The method, and the open software ('DDPT') (10) used in the previous study on allosteric  
29 homodimers is deployed here in a similar way (see Methods section) to a coarse-grained ENM model  
30 of the SARS-CoV-2 Main Protease.

31 **A. The SARS-CoV-2 Main Protease Protein.** At the time of this study (July 19, 2020) more than  
32 37,000 papers have been published in relation to the virus (See COVID-19 Primer). However, work is  
33 still in progress to identify biological and molecular pathways the virus takes. Fortunately, significant  
34 research has already been directed to very similar coronavirus - SARS-CoV, first identified in 2003.  
35 The SARS-CoV and SARS-CoV-2 genetic sequences are almost 80% identical (11). Both viruses  
36 encode the main protease ( $M^{\text{pro}}$ ), also known as the 3C-like protease ( $3\text{CL}^{\text{pro}}$ ). In its active form  $M^{\text{pro}}$   
37 is a two protomer homodimer with one active site per the homodimer chain (12). Although  $M^{\text{pro}}$  is  
38 a relatively compact protein (less than 310 residues per chain), it plays a vital role in the viral cycle  
39 of both coronaviruses: it divides polyproteins expressed from the viral mRNA into its functional  
40 non-structural units (13). This functional role makes SARS-CoV-2  $M^{\text{pro}}$  an appealing target for  
41 drug design. The major research effort to date has been focused on the competitive inhibition of  
42 SARS-CoV-2  $M^{\text{pro}}$ , i.e. by directly targeting the active site with molecules that competitively bind  
43 to the active site "pockets" (11, 14–16). A significant body of work has been recently published  
44 investigating inhibitors for the SARS-CoV-2 main protease via virtual screening and MD simulations  
45 (17–24). In 2011 it was found that N214A mutation dynamically inactivates SARS-CoV  $M^{\text{pro}}$  (25).

46 The same research group later characterised another SARS-CoV  $M^{\text{pro}}$  mutation, S284-T285-  
47 I286/A, which dynamically enhances the protease catalytic activity more than three-fold (26). In  
48 SARS-CoV-2  $M^{\text{pro}}$  two of those amino acids (T285 and I286) are changed to T285A and I286L with  
49 respect to SARS-CoV  $M^{\text{pro}}$ . However only a little enhancement in catalytic activity is observed (11).  
50 This delicate potential control region will appear below in our analysis (see section B.2.). Due to  
51 the high sequence conservation between both coronaviruses, and 96% amino acid sequence identity  
52 between the main proteases, SARS-CoV-2  $M^{\text{pro}}$  might possess similar allosteric features. Furthermore,  
53 in another study, researchers found the the root mean square deviation (RMSD) of 0.53 Å for apo  
54 (ligand-free) forms of two corona viruses' main proteases (PDB accession 2BX4 and 6Y2E) (11).  
55 These evidence that the N214A mutation operates through a fluctuation allostery mechanism and  
56 structural similarities between two proteases motivates the analysis of the coarse-grained dynamic  
57 structure of SARS-CoV-2  $M^{\text{pro}}$  reported here. We apply the ENM techniques of (9) to this purpose,  
58 looking in particular to identify non-active, yet allosteric, sites for non-competitive inhibition.

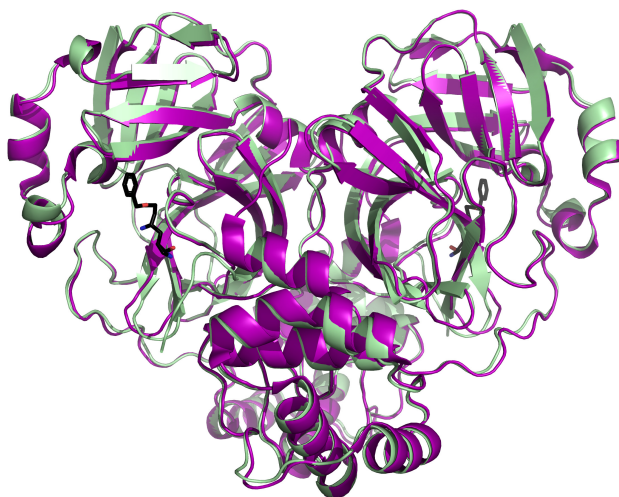

**Fig. 1.** Inhibited (pale-green) and ligand-free (purple) SARS-CoV-2 M<sup>pro</sup> crystallographic structures superimposed using the Combinatorial Extension (CE) algorithm in PyMOL (Schrödinger). The RMSD between two structures is 1.48 Å. Both proteins are shown as secondary structure cartoons while an  $\alpha$ -ketoamide inhibitor is shown in licorice representation. PDB accessions are 6LU7 and 6Y2E, respectively.

## 59 2. Simulations, Results and Discussions

60 No crystallographic structure of the SARS-CoV-2 M<sup>pro</sup>\* active form with a polyprotein is available  
61 to date. Only empty (apo) structures or structures with synthetic ligands/substrates attached to  
62 the active site available. Therefore, the ENM study reported here used a recent crystallographic  
63 structure (PDB accession 6LU7 (14)) with competitively inhibited active site to calculate fluctuation  
64 free energies and consequent allosteric energies and their modification under mutation. The inhibited  
65 (with  $\alpha$ -ketoamide inhibitors, referred as "holo2") and ligand-free (apo) structures of the protein  
66 are almost identical shown in figure 1. Resolutions for the structures shown are 2.16 Å and 1.75 Å  
67 respectively, while RMSD between them is under 1.5 Å for C $\alpha$  atoms. Evidently, very little structural  
68 change happens upon the inhibitor binding. These findings further support the hypothesis of  
69 dynamically driven allosteric control of SARS-CoV-2 M<sup>pro</sup>, and provide a structure (6LU7) on which  
70 to base an ENM construction (SI, Sec. A).

71 The resulting ENM of M<sup>pro</sup> is shown in figure 2. It takes C $\alpha$  node masses as the whole residue mass,  
72 and uses a cut-off distance for harmonic connecting springs of 8 Å, based on comparison of mode  
73 structures with full Molecular Dynamics simulations in previous work on Catabolite Activator Protein  
74 (9, 27)(SI, Sec. B). Balancing the requirements of: (i) sufficient spatial resolution of dynamics;  
75 (ii) requirements not to include unphysically small-scale structure; (iii) acceptable convergence of  
76 thermodynamic calculations; (vi) compatibility with the previous studies (28) leads to the choice of  
77 summing the first real 25 modes in SARS-CoV-2M<sup>pro</sup> ENM calculations (SI, Sec. C).

78 **A. Residue-residue dynamic cross-correlation map.** The first quantity of interest is the map of  
79 residue-residue cross-chain dynamic correlations, which indicates for each residue on the protein  
80 those other residues whose motion correlates with its own (Eq. 1). This gives both a detailed  
81 summary map of the homodimer dynamical structure, and is also significant thermodynamically  
82 since the same elastic communication drives both correlations and allosteric control (4). The dynamic

\* From now on, M<sup>pro</sup> will refer to the SARS-CoV-2 main protease protein

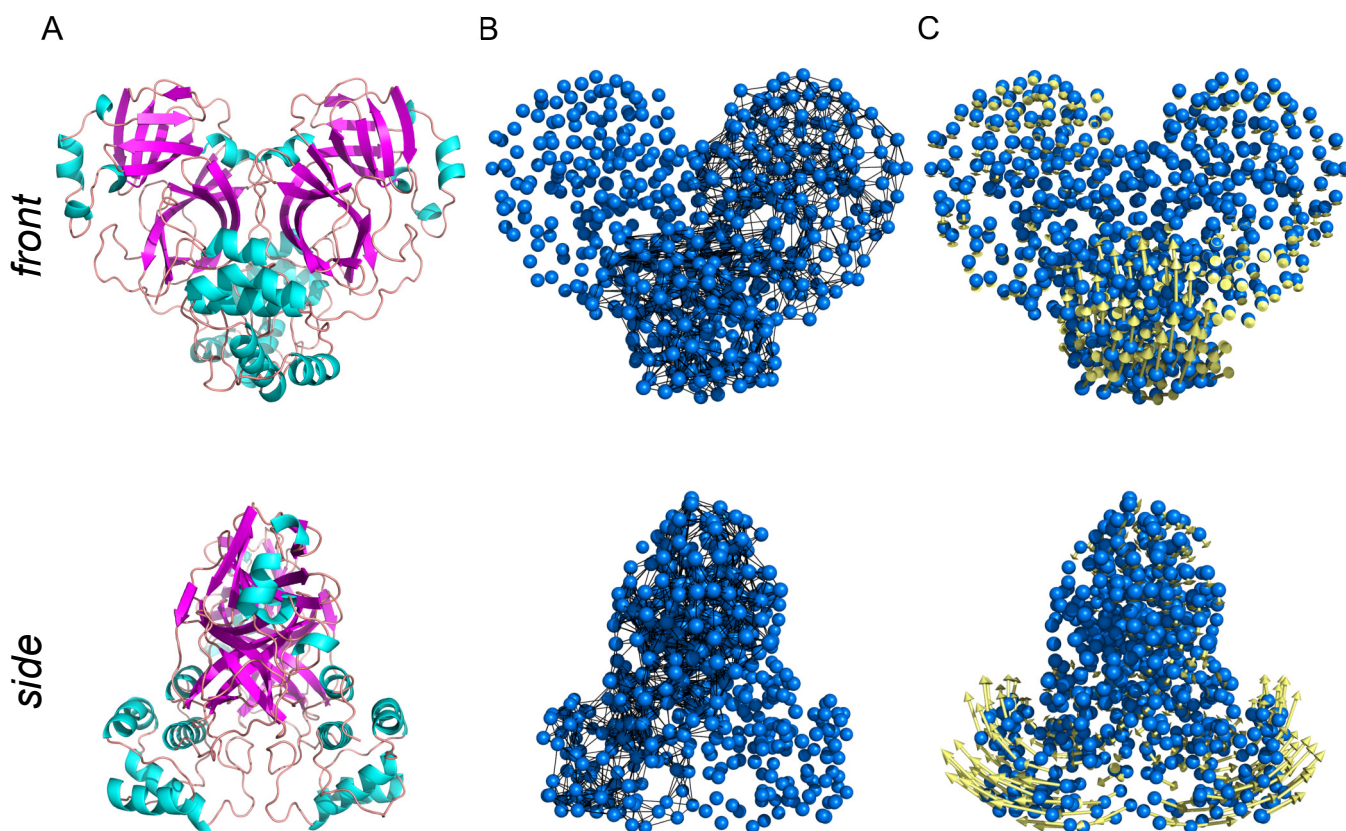

**Fig. 2.** Constructing ENM of SARS-CoV-2 M<sup>pro</sup> step-by-step. (A), SARS-CoV-2 M<sup>pro</sup> secondary structure cartoon (B), Elastic model of M<sup>pro</sup> generated with PyANM package in PyMOL. C $\alpha$  atoms are shown in blue; while node-connecting springs (black) are shown only for one chain for comparison. (C), The first real vibrational mode eigenvectors (yellow) visualisation. For clarity, displacement vectors are scaled 5 times.

83 cross-correlation of motion map for the all residues in the ENM apo (ligand-free), holo1 (only one  
84 active site at chain A occupied) and holo2 (both active sites occupied) structures are shown in figure  
85 3. We discuss the dynamic features of each structure in the following:

86 **A.1. apo.** The N-terminus of each chain positively correlates with residues adjacent to the active site  
87 (res 100-200) on the other chain. This is due to physical proximity rather than allostery (**Fig. 3A**,  
88 wide purple rectangles in lower right and upper left quadrants). Significantly, the dynamics of active  
89 sites on both chains positively correlate, and allosterically, with each other (**Fig. 3A**, green square  
90 and rectangle in lower right quadrant). These regions are spatially far away: we can not see them at  
91 the corresponding location on the distance map (**Fig. 3A**, green square and rectangle in upper left  
92 quadrant). The T201-N214 alpha helix (which contains the experimentally-sensitive N214) on one  
93 chain dynamically anti-correlates with H41 on the opposite chain. The same helix, from residue 201  
94 to 213, also anti-correlates with C145 on the opposite chain; while surprisingly (since its mutation is  
95 effective in allosteric control) N214 shows no correlation with the catalytically vital C145 at all. We  
96 observe strong positive correlation between this helix and two regions forming the active site pocket:  
97 residues K137-N142 (loop) and E166-H172 ( $\beta$ -turn) (**Fig. 3A**, narrow purple rectangles in lower  
98 right and upper left quadrants). However, this correlation can partially be accounted for by spatial  
99 proximity. S284-L285-A286 residues (henceforth SLA) on one monomer show positive cross-chain  
100 dynamic coupling of motion with the identical residues on the other, in this case through spatial



101 proximity (**Fig. 3A**, orange squares in lower right and upper left quadrants), but a somewhat  
102 smaller positive correlation spans residues 275 to 306 (N terminus) on both chains with respect  
103 to SLA. This effect suggests strong SLA coupling to a large fraction of the protein domain not  
104 containing the active site. Furthermore, SLA positively correlates with the T201-N214 alpha helix,  
105 which contains the experimentally determined dynamically allosteric residue N214. Beyond the helix,  
106 G215 and D216 show slightly greater correlation with SLA. Finally, SLA negatively correlate with  
107 the active site's catalytic dyad, H41 and C145, and residues around it (**Fig. 3A**, not shown). Thus,  
108 we observe both dynamic correlation at a distance, as well as that due to immediate spatial proximity,  
109 supporting previous findings regarding SARS-CoV M<sup>pro</sup> dynamically allosteric inactivation.

110 **A.2. holo1.** The positively correlated dynamics between the active sites are strongly enhanced by  
111 an addition of the first ligand, especially in regard to two beta sheets (G146-I152 and V157-L167)  
112 and a beta turn between them (**Fig. 3B**, green square in the lower right quadrant). Interestingly,  
113 and by contrast, the region displaying positive correlation around residues 50-70 in the apo form  
114 is decreased in the holo1 structure (**Fig. 3B**, green rectangle in the lower right quadrant). In  
115 the holo-1 form, the structural symmetry of the apo form is broken, permitting the asymmetric  
116 magnitude of correlation between chains A and B (**Fig. 3B**), across the diagonal of the lower  
117 right quadrant). The biologically active residues (green ticks) show up in the ligand's correlation  
118 with (host) chain A. However, four other regions, not cited in the literature to date, also show  
119 strong dynamic correlation with the ligand. Two of them (res 17-32 and 120-131) can be vividly  
120 observed as spatially proximal to the ligand from the corresponding distance map. Two other regions  
121 exhibiting positive cross-correlation are, however, distant from the ligand (**Fig. 3B**, blue rectangles  
122 in lower right and upper left quadrants). These regions span residues 67-75 and 77-91, respectively,  
123 and include two beta sheets and a beta turn in each case. The previously reported dynamically  
124 allosteric residue 214 (chain B) correlates positively with ligand on chain A; potentially due to  
125 spatial proximity. The closest ligand's residue to N214 is 11.2 Å away. Moreover, the ligand shows  
126 positive correlation at distance with the beta sheets on the opposite chain (**Fig. 3B**, blue rectangles  
127 in upper right quadrant). The fact that the ligand's motion positively correlates with beta sheets at  
128 residues 67-75 and 77-91 on both chains suggests strong chain-ligand coupling around residues 67-91  
129 region on both homodimer chains.

130 The dynamically allosteric SLA and the region around dynamically couples to the same residues on  
131 the opposite chain (**Fig. 3B**, orange square in lower right quadrant). The structural  $C_2$  symmetry  
132 breaking upon the ligand binding decouples motion of residues which are far away from the active  
133 site (**Fig. 3B**, orange square in lower right quadrant). Thus these residues can engage in a collective  
134 motion driven by spatial proximity to their neighbours. Not seen on apo cross-correlation map, the  
135 second half of the N261-N274 alpha helix on chain B appears to correlate positively with four distant  
136 residue groups in 15-100 region on chain A (**Fig. 3B**, orange rectangle in upper left and lower right  
137 quadrants). Moreover, addition of the ligand enhanced produced an 'H' shape correlation (on the  
138 cross-correlation map) between four beta sheets, two on each chain: G146-I152 and V157-L167 on  
139 chain A, G109-Y118 and S121-R131 on chain B (**Fig. 3B**, purple square in lower right quadrant).  
140 This group motion across chains is partially caused by two neighbouring beta turns sticking out of  
141 active site protein domains (**Fig. 3B**, purple square in upper left quadrant).

142 **A.3. holo2.** When a second ligand is added, the strong correlation between active sites present in  
143 holo1 is diminished (**Fig. 3C**, green square in lower right quadrant); while previously lowered  
144 correlation reaches the apo form level (green rectangle in the same quadrant and figure). The  
145 region around SLA and the N261-N274 alpha helix, which shows strong dynamical coupling with

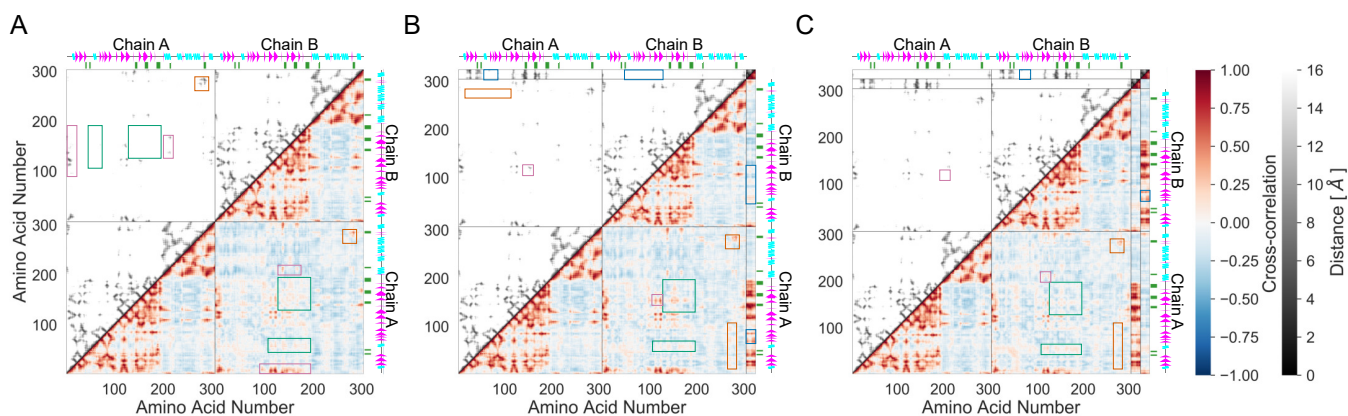

**Fig. 3.** The cross correlation of the motion for the first real 25 modes and distance between residues ( $C\alpha$  nodes) as shown in 2-dimensional residue space for (*left*) apo, (*middle*) holo1 and (*right*) holo2 forms of 6LU7 ENM . The first colour scale show the extent of cross correlation, with a cross correlation of 1 (red) indicating perfectly correlated motion, -1 (blue) showing perfectly anti-correlated motion and 0 (white) no correlation. The second colour scale (black to white) depicts the Euclidean distance between two  $C\alpha$  nodes in the Cartesian space in 0-16 Å range. The secondary structure of  $M^{PTO}$  is indicated along the residue axes, with cyan waves indicating alpha helices, and magenta triangles indicating beta sheets. The green ticks on the axis indicate the location of the biologically active residues (**Tab. 1**). The cross correlation matrix was calculated using only the  $C\alpha$  atoms for the protein and all heavy atoms for ligand ( $\alpha$ -ketoamide inhibitor).

146 the residue groups in interval 15-100 of the holo1 form, is reduced on binding the second effector to  
 147 its previous apo level correlation (**Fig. 3C**, orange square and rectangle in lower right quadrant).  
 148 The newly added ligand on chain B shows the same correlation-at-distance with the L66-A70 and  
 149 V73-L75 beta sheets, excluding the beta turn in between them (**Fig. 3B**, blue rectangles in upper  
 150 right quadrant). Nevertheless, the cross chain coupling between active site and the alpha helix  
 151 (T201-N214) is further increased. The correlation is split into three distinctive regions in locally  
 152 'wedge-like' shapes on the map, two of which are around active site. These structures were also  
 153 seen in the CAP cross-correlation map (9), and indicate the two contributing beta strands acting  
 154 as a local hinge region. The third region is located around a beta sheet at S121-R131, which is  
 155 not bound to the ligand (**Fig. 3C**, purple squares in lower right and upper left quadrants). The  
 156 cross-correlation displays an interesting structure along the helix from residue N201 to T214: the  
 157 third region is split into three zones: positive, negative and positive correlation. This sign change  
 158 reminds 3-rd harmonic of a standing wave with two nodal points, whereas in 3D those are nodal  
 159 planes. The negative correlation region is absorbed by the two positive regions as we reach residue  
 160 N214. Unsurprisingly, the two ligands exhibit identical correlations with their host and opposite  
 161 chains. Noteworthy, each ligand has dynamics correlating positively with the termini of the opposite  
 162 chain, arising principally from the spatial proximity of C and N termini to the opposite chain's  
 163 active site.

164 **B. Mutation scans for thermodynamic control.** The ENM calculations were extended to calcula-  
 165 tions of fluctuation (entropic) free energies (**Eq. 2**) of various modelled wild type and mutated  
 166 state of SARS-CoV-2  $M^{PTO}$ . 'Point mutations' are modelled in these ENM calculations, as in (9) by  
 167 softening or stiffening all the harmonic springs attached to each residue in a complete scan of equally  
 168 spaced spring moduli with centre at 1.00 in range from 0.25 to 4.00. Figure 4A reports the free  
 169 energy changes  $(G_{mut} - G_{wt})/|G_{wt}|$  induced in the entire homodimer when this point mutation is

170 done. Figure 4C reports the effect of the same mutational scan on the allosteric free energy  $K_2/K_1$   
 171 (Eq. 3) of binding between the two active sites.

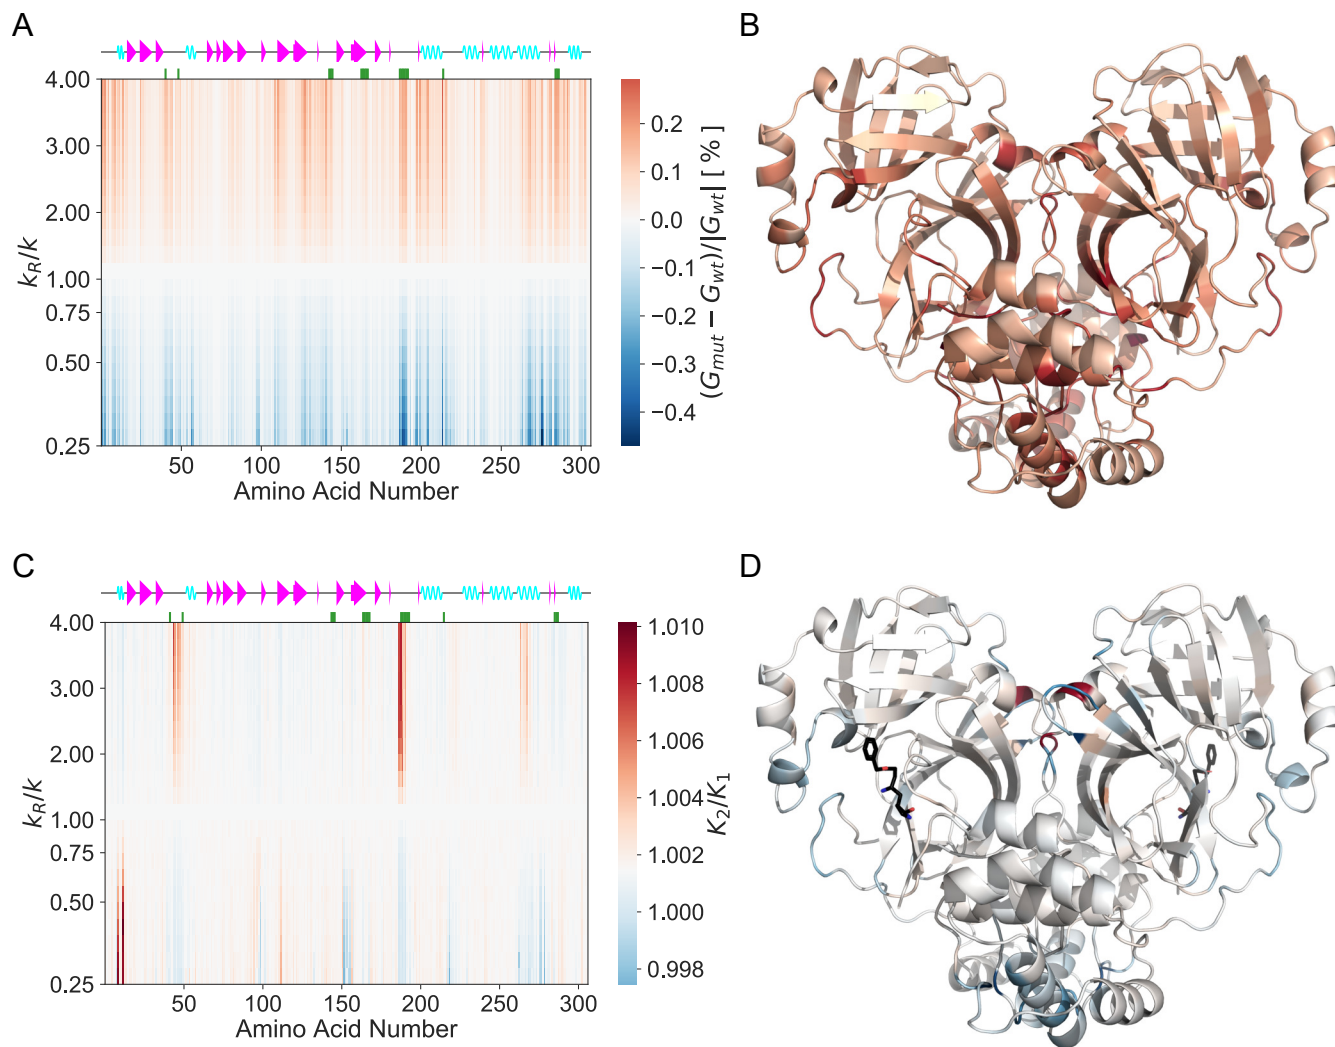

**Fig. 4.** Mutation scan maps for thermodynamic control of  $M^{pro}$  calculated from the ENM over the first real 25 fluctuation modes. (A) A map for the fluctuation free energy change. The map plots the relative change in free energy to the wild type  $((G_{mut} - G_{wt})/|G_{wt}|)$  due to the dimensionless change in the spring constant ( $k_R/k$ ) for the mutated residue with the amino acid number shown. White corresponds to values of free energy predicted by the wild-type ENM. Red corresponds to an increase in  $(G_{mut} - G_{wt})/|G_{wt}|$  (decreased value of  $G_{mut}$  comparing to  $G_{wt}$ ), whereas blue corresponds to a decrease in  $((G_{mut} - G_{wt})/|G_{wt}|)$  (increased value of  $G_{mut}$  comparing to  $G_{wt}$ ). (B) The map for the vibrational free energy change plotted in real space onto the wild-type  $M^{pro}$  homodimer structure at  $k_R/k=4.00$ . (C) A map for the global control space of allostery in  $M^{pro}$ . The map plots the change in cooperativity coefficient ( $K_2/K_1$ ) due to the dimensionless change in the spring constant ( $k_R/k$ ) for the mutated residue with the amino acid number shown. White corresponds to values of  $K_2/K_1$  predicted by the wild-type ENM. Red corresponds to an increase in  $K_2/K_1$  (stronger negative cooperativity), whereas blue corresponds to a decrease in  $K_2/K_1$  (weaker negative cooperativity or positive cooperativity). (D) The global map plotted in real space onto the wild-type  $M^{pro}$  homodimer structure at  $k_R/k=0.25$ .

172 **B.1. Free energy mutation scan on apo structure.** All experimentally identified active sites (besides  
 173 res 163-167) appear on the mutation scan of the 6LU7 apo structure, a somewhat remarkable

174 result considering that no ligand is present to emphasise the spatial nature of the active sites.  
175 They seem dynamically pre-disposed to dynamic allosteric communication, in agreement with the  
176 cross-correlation map (**Fig. 3**). Both termini display mutation peaks due to their spatial proximity  
177 to the active sites. Additionally, a very sharp peak is seen around residues 187-192 where a free  
178 loop forming the active site is located. The seven new regions seen on the cross-correlation map  
179 (res 17-32, 67-75, 77-91, 97-98, 120-131, 201-214 and 261-274) form distinctive peaks as well on the  
180 mutation scan.

181 Furthermore, the experimentally identified residue N214 is signposted by these calculations: its  
182 computational mutation generates the largest fluctuation free energy change upon spring stiffening  
183 of 0.29 % at  $k_R/k=4.00$ . The largest negative free energy change value of -0.47 % is produced upon  
184 spring relaxation of M276 at  $k_R/k=0.25$ . These two points define the amplitude of the colour bar.  
185 Although the catalytically paramount residue C145 is not as sharp as other peaks, it appears with  
186 greater strength in a higher mode summation (**SI, Fig. S3A**). The map is mostly qualitatively  
187 anti-symmetric around middle line (wild-type). However, the quantitative behaviour of three regions  
188 worthy of attention: the region around residue 50, before 100, at residue 150, as well as the sharpest  
189 region around residues 187-192. Relaxation of stiffness at those points cause larger energy change  
190 than stiffening. A very narrow region, not identified on the cross-correlation map, at residues 97-98,  
191 preceding a small beta sheet at res Y101-V104, appears sharply when local interaction strengths are  
192 relaxed.

193 A new broad region of strong sensitivity to mutation appears on this map at residues 261-293,  
194 which includes an alpha helix at V261-N274. This helix is located on the surface of the protein  
195 far from the active site. This region also contains SLA which appear as sharp lines in figure 4A;  
196 and is especially responsive to spring constant change at L285: a free-energy change of 0.19 % at  
197  $k_R/k=4.00$  and -0.29 % at  $k_R/k=0.25$ . L285 is in the middle residue of the triad affecting two of its  
198 neighbours; furthermore, L285 on one chain is in the closest contact with its counterpart on the  
199 other chain (5.3 Å).

200 We also note 7 residues which are located on the homodimer chains' interface (K5, P9, K12, E14,  
201 M276, I281 and S284), recalling that in the CAP homodimer, residues located on the interface were  
202 critical in allosteric regulation (9). Especially responsive is E14 located on the very first alpha helix.

203 **B.2. Allosteric free energy mutation scan.** The first result from the ENM calculation of the allosteric  
204 free energy for binding-site occupation is that  $K_2/K_1 \approx 1$  for the wild-type  $M^{\text{pro}}$  ENM. Therefore,  
205 this ENM model (over 25 softest modes) is non-cooperative. Nevertheless, we can identify regions  
206 that are sensitive to even slight change in local stiffness which again are around biologically active  
207 areas. All previously-marked active regions show-up to some extent; especially vivid is the region  
208 around catalytic residue H41 and, as already appeared in the apo mutation scan, the loop around  
209 the active site (res 187-192). Residue N214 shows very weak allosteric control in this scan. The local  
210 environment around N214 is mainly hydrophobic (**SI, Fig. S4**). Therefore, the experimentally-  
211 reported N214A mutation corresponds to a local structural stiffening (asparagine (N) is hydrophilic  
212 while alanine (A) is hydrophobic). This is indeed the region of parameter space ( $k_R/k>1$ ) where  
213 this mutation displays a weak effect in the ENM model, but a strong response upon relaxation.

214 In SARS-CoV-2  $M^{\text{pro}}$  residues T285 and I286 are replaced by L285 and A286 with respect to  
215 SARS-CoV  $M^{\text{pro}}$ . Purely from the perspective of hydrophobicity of residue and environment, the  
216 former mutation would correspond to  $k_R/k>1$ , while the latter emulates  $k_R/k<1$ . However, no exact  
217 comparison with experimental data can be made as there is no data on how S284-L285-A286/A  
218 simultaneous mutation affects SARS-CoV-2  $M^{\text{pro}}$  catalytic activity. Without data on single mutations  
219 within the SLA region, we have no direct experimental verification of the single S284A mutation



220 which in our ENM corresponds to  $k_R/k > 1$  for similar reasons as for N214A mutation (SI, Fig. S4).  
221 We see a decrease in cooperativity for S284 spring stiffening, while for spring relaxation the ENM's  
222 cooperativity increases.

223 **C. 2-point mutational scans.** It is of interest to explore the cooperative effect of two-point mutations  
224 in models of fluctuation allostery, as previous work has indicated that double mutations may combine  
225 non-linearly in control of the allosteric landscape of proteins (27). This numerical scan explores  
226 cases where mutations are made not only on one of the single homodimeric chains: experimentally  
227 this is a possible, but not a trivial, task. However it can reveal contribution of each chain alone to  
228 fluctuation and allostery of the dimeric composite structure. The discussion of this sections refers to  
229 results presented in the 2-point scans of 6LU7 ENM in figure 5. In order to present the response to  
230 all double-mutations on a single 2D plot, the change in spring stiffness is not scanned; rather, just  
231 two constant spring changes of 0.25 and 4.00 are considered. Spring-stiffening 2-point mutational  
232 scans (Fig. 5A,C),  $k_R/k=4.00$ , models the effect of small molecule/ligand binding to the mutated  
233 residues (and would also model mutations such as N214A (SI, Fig. S4)); while  $k_R/k=0.25$  map  
234 looks at the opposite extreme to the stiffening case, which would model mutations that weaken local  
235 bonding (Fig. 5B,D).

236 **C.1. Free energy 2-point mutation scan on apo structure.** The first measure, as in the single-point  
237 scans, is the difference in total free energy of the apo structure. As on the 1-point map for apo 6LU7  
238 structure strong lines are observed (Fig. 5A,B), but spring relaxation resolves fewer biologically  
239 active residues than spring stiffening. In figure 5A only residues around H41, a loop region forming  
240 active site at D187-A191 and N214 show up as solid lines. Whilst, stiffening (Fig. 5B) resolves  
241 all bioactive residues except H163-L167 (beta sheet forming the active site pocket) with with an  
242 additional region around a small beta sheet (Y101-V104), alpha helices (T201-N214 and V261-N274)  
243 and loop region adjacent to the latter helix. As in case of the 1-point map (Fig. 4A) M276 (-0.47 %) and  
244 N214 (0.29 %) define maximum absolute response upon relaxation and stiffening of these residues  
245 on both chains, respectively (Fig. 5A,B). In both cases the SLA region show moderate fluctuation  
246 free energy change. We conclude that stiffening is a better choice for resolving critical residues in  
247 fluctuation free energy control. Note that, in the case of this protein, the 2-point mutations combine  
248 approximately linearly: the effect of the first mutation (vertical lines) is not strongly affected by the  
second mutation. Nevertheless, response to relaxation and stiffening qualitatively different plots.

**Table 1. SARS-CoV-2 Main Protease key information used in this study: PDB ID; experimentally identified bioactive residues of SARS-CoV M<sup>Pro</sup> reported in literature; active regions which we identified in this study, distant from the active site for SARS-CoV-2 M<sup>Pro</sup> (SI, Section D).**

| Protein                  | PDB ID | Experimentally Identified Bioactive Residues              | Computationally Identified Distant Control Residues (this study)                               |
|--------------------------|--------|-----------------------------------------------------------|------------------------------------------------------------------------------------------------|
| SARS-CoV-2 Main Protease | 6LU7   | 41, 49, 143-5, 163-7, 187-192 (18)<br>214, 284-6 (25, 26) | 5, 9, 14, 109, 111, 127, 197-8,<br>200, 205, 214, 264, 268-9,<br>272, 276-7, 281-2, 284-6, 292 |

249

250 **C.2. Allosteric free energy 2-point mutation scan.** Finally, the effect of all double mutations upon  
251 spring relaxation and stiffening on the allosteric free energy between the two active sites was  
252 calculated (Fig. 5C,D). While the 2-point apo maps show qualitatively different behaviour for  
253 relaxation and stiffening, the allosteric free energy 2-point mutation maps are qualitatively exactly

254 the same with an inverted allosteric free energy change sign. A new strong control site that did not  
255 appear on the 2-point apo maps (**Fig. 5A,B**) is found at the beginning of the second beta-sheet  
256 (T25-L32) on each chain (**Fig. 5C,D**). Additionally, S1 and G302 exhibit strong allosteric control  
257 due to spatial closeness to the active site and, thus, the ligand. The apparent increased cooperativity  
258 for both mutations (in most cases) on chain A, and the same pattern of decreased cooperativity on  
259 chain B, is due to the formal symmetry breaking through choice of the first binding site at chain A.  
260 Mutation of residues around H41 are the exception, and have an opposite effect on allostery to all  
261 others. The dashed lines represent the 1-point allo scan in figure 4 for corresponding  $k_R/k$  values.  
262 In that scan  $K_2/K_1$  values range from 0.998 to 1.010, while for these 2-point mutational scans the  
263 range is slightly increased.

264 This calculation draws attention to an additional advantage of the 2-point scans: while N214 did  
265 not exhibit allosteric control on the 1-point map (**Fig. 4C**) over 25 fluctuation modes, it appears  
266 as a strong line in all quadrants on the 2-point maps. However, when the lines intersect in the  
267 cross-chain quadrant  $K_2/K_1$  reaches almost wild-type value (corresponding to making exactly the  
268 same change on both monomers). This effect explains why we do not observe allosteric control of  
269 N214 on the 1-point mutational map: evidently, when the bold lines intersect (identical mutation or  
270 binding on both domains) allosteric effects interfere destructively. Thus, in the 1-point allo scan for  
271 6LU7 ENM amplitude of  $K_2/K_1$  is lower than in the 2-point mutational allosteric scan or hardly  
272 shows up. The SLA region appears neither on the 1-point nor 2-point global maps for dynamic  
273 regulation of allostery in spite of its presence on the free-energy apo scans. This absence of control  
274 indicates the limited coupling between SLA and the given ligand ( $\alpha$ -ketoamide inhibitor).

### 275 **3. Discussion: what does ENM tell us about SARS-CoV-2 Main Protease?**

276 The ENM analysis reinforces previous findings in application to other proteins, that in the SARS-  
277 CoV-2 M<sup>pro</sup> as well, local harmonic potentials within the equilibrium protein structure, but without  
278 mean structural change can identify already known biologically active sites. Furthermore, there is  
279 no need to have holo forms of the protein to locate those active sites, whose correlated dynamics are  
280 already clear in the apo form. Calculations of those sites where total free energies are sensitive to  
281 mutations converge well with the limit of the sum over normal modes. The convergence of calculations  
282 of control of the allosteric free energy itself is more subject to noise, being a difference-quantity, but  
283 sufficiently to identify strong candidates for control regions (**SI, Fig. S3**).

284 The analysis shows that SARS-CoV-2 M<sup>pro</sup> possesses a rich dynamical structure that supports several  
285 long-distance allosteric effects through thermal excitation of global normal modes. In particular the  
286 motions in the vicinity of two active sites are correlated within the first 25 non-trivial normal modes,  
287 especially in the singly-bound dimer. Although, at the level of ENM calculations, this does not lead  
288 to cooperativity in the WT structure, it does render the protein susceptible to the introduction of  
289 cooperativity by mutation.

290 Our methodology is further supported by the ENM dynamics sensitivity to residue 214 and 284-286  
291 mutation which has been previously experimentally verified to dynamically control SARS-CoV M<sup>pro</sup>.  
292 The ENM calculations have identified new sites whose local thermal dynamics dynamically correlate  
293 with those of the active sites, and which also appear on global maps for allosteric control by single  
294 or double mutations. The new candidate control regions are summarised in table 1. In particular,  
295 residues around the beta sheets (Y101-V104, G109-Y118 and S121-R131) and the alpha helices  
296 (T201-N214 and V261-N274) are novel, and distant from the active site (**SI, Fig. S5**). The position  
297 of these residues suggest them as possible candidates for non-competitive inhibiting binding sites.  
298 We also draw attention to eight residues located on M<sup>pro</sup> interface surface (**Tab. 1**) as a potential

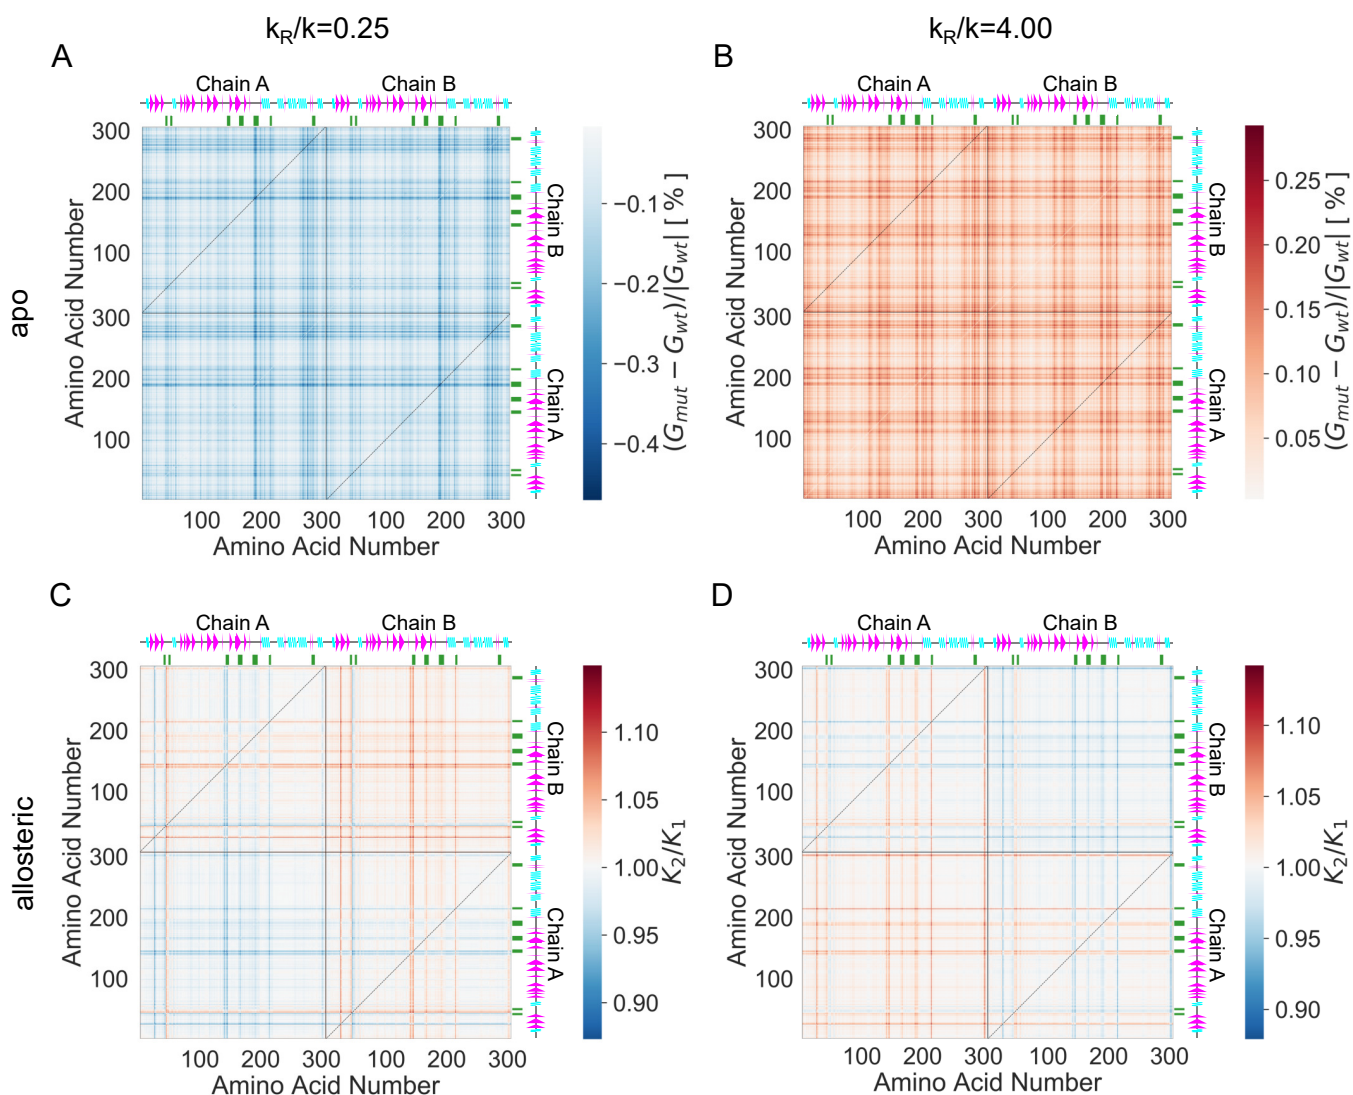

**Fig. 5.** 2-point mutational maps for 6LU7 ENM with all possible pairwise combinations of residue mutations with equal spring constant change  $k_R/k$  equal 0.25 and 4.00 over the first real 25 fluctuation modes. (A,B) 2-point mutational maps for 6LU7 ENM with all possible pairwise combinations of residue mutations with equal spring constant change (A)  $k_R/k=4.00$  (spring stiffening) and (B)  $k_R/k=0.25$  (spring relaxation). (C,D) A map for the 2D global control space of allostery in  $M^{pro}$  for (C)  $k_R/k=4.00$  and (D)  $k_R/k=0.25$ . Black solid lines separate two homodimer chains, while dashed lines represent 1-point mutational scan results for the given spring constant change.

299 dynamically allosteric control residues.

300 Computational studies such as this, therefore, accompany and support concurrent experimental  
 301 programs of scanning for small-molecule binding candidates to the protein in question. We note that  
 302 several candidate molecules, identified in a very recent large crystallographic fragment screen against  
 303 SARS-CoV-2  $M^{pro}$  (29), bind to regions suggested as dynamically sensitive control candidates in  
 304 this study.

305 The ENM model employed was specific for the given inhibitor. Other ligands might, of course, show  
 306 different behaviour in the corresponding holo structures and display other "hot-spots", however,  
 307 the appearance of active regions, and their coupling, in the apo structure suggests that there are  
 308 general properties that emerge from the global elastic structure of the protein. As well as providing

309 specific information on the SARS-CoV-2 M<sup>pro</sup> structure of the calculations reported there, the  
310 findings of this study also contribute to the large programme of research on fluctuation-induced  
311 allostery without conformational change. In particular the general question of the focusing of  
312 dynamic correlations between distant (so candidate allosteric) sites is solved in a highly specific  
313 way by this structure. It also constitutes a system for which double mutations contribute in a  
314 predominantly linear addition, in contrast to findings with other allosteric homodimers. This pattern  
315 includes the cancellation phenomenon we identified in the case of some single point mutations made  
316 identically and simultaneously in both monomers, whose cancellation in the 1-d scans can mask  
317 their potential sensitivity as target sites. Finally, the appearance of control regions on the exterior  
318 surface of proteins, with obvious pharmacological application, generates other general questions in  
319 the biophysics of fluctuation elasticity in globular proteins.

## 320 **Materials and Methods**

321 Normal Mode Analysis (NMA) of ENM describes protein motions around equilibrium and can be used to  
322 calculate the partition function for large scale harmonic thermal fluctuations in protein structure, including  
323 those responsible for allostery (30). Two main approximations of NMA are:

- 324 • The structure fluctuates about at local energy minimum. Consequently no other structures beyond  
325 the given equilibrium can be explored.
- 326 • The force field everywhere arises from sums over ENM harmonic

327 The whole NMA method can be reduced to three steps:

- 328 1. Construct mass-weighted Hessian for a system. For a protein ENM the system consists of the  
329 co-ordinates of the C-alpha atoms ( $N$ ) for each residue from the corresponding PDB structure.
- 330 2. Diagonalise the mass-weighted Hessian to find eigenvectors and eigenvalues of the normal modes.
- 331 3. Calculate the partition function (and so free energy) from the product over the normal mode harmonic  
332 oscillations.

The diagonalisation of the  $3N \times 3N$  mass-weighted Hessian matrix is written as

$$\mathbf{A}^{-1}\tilde{\mathbf{H}}\mathbf{A} = \mathbf{\Lambda}$$

where  $\tilde{H}_{ij} = \frac{\partial^2 V_{ij}}{\partial r_i \sqrt{m_i} \partial r_j \sqrt{m_j}}$ : the potential energy function  $V$ ; distance between nodes  $r$ ; node masses  $m$ .

The eigenvectors of the mass-weighted Hessian matrix, columns of  $\mathbf{A}$ , are the normal mode eigenvectors  $\mathbf{a}$ .

$$\mathbf{A} = \begin{pmatrix} | & | & \cdots & | \\ \mathbf{a}_1 & \mathbf{a}_2 & & \mathbf{a}_{3N} \\ | & | & & | \end{pmatrix}$$

$\mathbf{\Lambda}$  is a  $3N \times 3N$  diagonal matrix with diagonal values equal to the associated normal modes' squared angular frequencies  $\omega^2$ . The potential function used in this study is:

$$V_{ij} = \begin{cases} \frac{k_{ij}}{2} (r_{ij} - r_{ij}^{(0)})^2 & r_{ij}^2 \leq r_c^2 \\ 0 & r_{ij}^2 > r_c^2 \end{cases}$$

333 where  $r_c$  is a cut-off radius, which for this work is set at  $8 \text{ \AA}$ ; while  $r^{(0)}$  is the equilibrium distance between  
334 nodes derived from PDB crystallographic structure. For the wild-type protein, all spring constants are  
335 equal  $k_{ij} = k = 1 \text{ kcal } \text{\AA}^{-2} \text{ mol}^{-1}$ .



336 **Cross-correlation of Motion.** The cross-correlation,  $C$ , is estimated between an ENM node pair as a  
337 normalised dot product sum between their normal mode eigenvectors over  $v$  modes.

$$338 \quad C_{ij} = \sum_v \left( \frac{\mathbf{a}_i(v) \cdot \mathbf{a}_j(v)}{\sqrt{|\mathbf{a}_i(v)|^2 |\mathbf{a}_j(v)|^2}} \right) \quad [1]$$

339  $C$  value of 1 implies perfectly correlated motion, -1 perfectly anti-correlated motion and 0 implies totally  
340 non-correlated motion.

**Normal Mode Fluctuation Free Energy.** Using statistical mechanics it is possible to calculate an estimate to the fluctuation free energy of a system using the frequency of vibrations such as the normal modes. For this method, the partition function for the quantum harmonic oscillator (31),  $Z$ , for normal mode  $k$  is given as

$$Z_k = \frac{\exp\left(-\frac{1}{2} \frac{\hbar\omega_k}{k_B T}\right)}{1 - \exp\left(-\frac{\hbar\omega_k}{k_B T}\right)}$$

341 where  $k_B$  is the Boltzmann's constant,  $\hbar$  is the reduced Planck's constant,  $T$  is temperature in Kelvin and  
342  $\omega$  is, already mentioned, angular frequency. Gibbs free energy (for a given mode) expressed in terms of  
343 partition function, with an approximation of little change in volume, can be written as

$$344 \quad G_k = -k_B T \ln \left( \frac{1}{1 - \exp\left(-\frac{\hbar\omega_k}{k_B T}\right)} \right) + \frac{1}{2} \hbar\omega_k \quad [2]$$

345 **Ligand Dissociation Constant.** When free energy change  $\Delta G$  (SI, Sec. ) is known for a dissociation  
346 reaction, corresponding dissociation constant  $K$  can be estimated via

$$347 \quad K = \exp\left(-\frac{\Delta G}{k_B T}\right) \quad [3]$$

348 **Data and Code Availability.** All data as well as the code to make the figures in this manuscript are available  
349 at <https://github.com/burano/CompDynAlloMpro>.

350 DDPT source code can be accessed at <https://sourceforge.net/projects/durham-ddpt>.

351 **ACKNOWLEDGMENTS.** ID is grateful for computational support from the University of York high  
352 performance computing service, The Viking Cluster, especially Dr. Andrew Smith. TCBM acknowledges  
353 support from the EPSRC(UK) through an Established Career Fellowship in the Physics of Life programme.  
354 We are grateful to Dr. Alice von der Heydt, Prof. Peter O'Brian and Dr. Sarah Harris for useful discussions

- 355 1. J Monod, J Wyman, JP Changeux, On the nature of allosteric transitions—a plausible model. *J. Mol. Biol.* **12**, 88–118 (1965).
- 356 2. A Cooper, DT Dryden, Allostery without conformational change. a plausible model. *Eur. Biophys. J.* **11**, 103–109 (1984).
- 357 3. RJ Hawkins, TC McLeish, Dynamic allostery of protein alpha helical coiled-coils. *J. The Royal Soc. Interface* **3**, 125–138 (2006).
- 358 4. TCB McLeish, TL Rodgers, MR Wilson, Allostery without conformation change: modelling protein dynamics at multiple scales. *Phys. biology* **10**, 056004 (2013).
- 359 5. C Schaefer, AC vonderHeydt, T McLeish, The 'allosteron' model for entropic allostery of self-assembly. *Philos. Transactions* **373**, 20170186 (2018).
- 360 6. N Go, T Noguti, T Nishikawa, Dynamics of a small globular protein in terms of low-frequency vibrational modes. *Proc. Natl. Acad. Sci.* **80**, 3696–3700 (1983).
- 361
- 362
- 363
- 364
- 365
- 366

- 367 7. B Brooks, M Karplus, Normal modes for specific motions of macromolecules: application to the  
368 hinge-bending mode of lysozyme. *Proc. Natl. Acad. Sci.* **82**, 4995–4999 (1985).
- 369 8. I Bahar, A Atilgan, B Erman, Direct evaluation of thermal fluctuations in proteins using a single-  
370 parameter harmonic potential. *Fold Des* **2**, 173–181 (1997).
- 371 9. TL Rodgers, et al., Modulation of global low-frequency motions underlies allosteric regulation:  
372 demonstration in crp/fnr family transcription factors. *PLoS biology* **11** (2013).
- 373 10. TL Rodgers, et al., Ddpt: a comprehensive toolbox for the analysis of protein motion. *BMC*  
374 *Bioinforma.* **14**, 183 (2013).
- 375 11. L Zhang, et al., Crystal structure of sars-cov-2 main protease provides a basis for design of  
376 improved  $\alpha$ -ketoamide inhibitors. *Science* (2020).
- 377 12. T Muramatsu, et al., Sars-cov 3cl protease cleaves its c-terminal autoprocessing site by novel  
378 subsite cooperativity. *Proc. Natl. Acad. Sci.* **113**, 12997–13002 (2016).
- 379 13. T Pillaiyar, M Manickam, V Namasivayam, Y Hayashi, SH Jung, An overview of severe acute  
380 respiratory syndrome–coronavirus (sars-cov) 3cl protease inhibitors: Peptidomimetics and small  
381 molecule chemotherapy. *J. medicinal chemistry* **59**, 6595–6628 (2016).
- 382 14. Z Jin, et al., Structure of m<sup>pro</sup> from covid-19 virus and discovery of its inhibitors. *Nature* (2020).
- 383 15. W Dai, et al., Structure-based design of antiviral drug candidates targeting the sars-cov-2 main  
384 protease. *Science* (2020).
- 385 16. Z Jin, et al., Structural basis for the inhibition of sars-cov-2 main protease by antineoplastic drug  
386 carmofur. *Nat. Struct. & Mol. Biol.*, 1–4 (2020).
- 387 17. L Di Paola, A Giuliani, Mapping active allosteric loci sars-cov spike proteins by means of protein  
388 contact networks. *arXiv preprint arXiv:2003.05200* (2020).
- 389 18. YW Chen, CPB Yiu, KY Wong, Prediction of the sars-cov-2 (2019-ncov) 3c-like protease (3cl pro)  
390 structure: virtual screening reveals velpatasvir, ledipasvir, and other drug repurposing candidates.  
391 *F1000Research* **9** (2020).
- 392 19. X Ou, et al., Characterization of spike glycoprotein of sars-cov-2 on virus entry and its immune  
393 cross-reactivity with sars-cov. *Nat. communications* **11**, 1–12 (2020).
- 394 20. AT Ton, F Gentile, M Hsing, F Ban, A Cherkasov, Rapid identification of potential inhibitors of  
395 sars-cov-2 main protease by deep docking of 1.3 billion compounds. *Mol. Informatics* (2020).
- 396 21. M Kandeel, M Al-Nazawi, Virtual screening and repurposing of fda approved drugs against  
397 covid-19 main protease. *Life Sci.*, 117627 (2020).
- 398 22. E Estrada, Topological analysis of sars cov-2 main protease. *bioRxiv* (2020).
- 399 23. M Hofmarcher, et al., Large-scale ligand-based virtual screening for sars-cov-2 inhibitors using  
400 deep neural networks. *Available at SSRN 3561442* (2020).
- 401 24. AD Elmezayen, A Al-Obaidi, AT Şahin, K Yelekçi, Drug repurposing for coronavirus (covid-19):  
402 in silico screening of known drugs against coronavirus 3cl hydrolase and protease enzymes. *J.*  
403 *Biomol. Struct. Dyn.*, 1–12 (2020).
- 404 25. J Shi, et al., Dynamically-driven inactivation of the catalytic machinery of the sars 3c-like protease  
405 by the n214a mutation on the extra domain. *PLoS computational biology* **7** (2011).
- 406 26. L Lim, J Shi, Y Mu, J Song, Dynamically-driven enhancement of the catalytic machinery of the  
407 sars 3c-like protease by the s284-t285-i286/a mutations on the extra domain. *PLoS one* **9** (2014).
- 408 27. PD Townsend, et al., The role of protein-ligand contacts in allosteric regulation of the escherichia  
409 coli catabolite activator protein. *J. Biol. Chem.* **290**, 22225–22235 (2015).
- 410 28. PD Townsend, et al., Global low-frequency motions in protein allostery: Cap as a model system.  
411 *Biophys. reviews* **7**, 175–182 (2015).
- 412 29. Diamond Synchrotron, Main Protease Structure and XChem Fragment Screen ([Link](#)) (2020)  
413 Online: accessed 20/05/2020.
- 414 30. I Bahar, TR Lezon, A Bakan, IH Shrivastava, Normal mode analysis of biomolecular structures:  
415 functional mechanisms of membrane proteins. *Chem. reviews* **110**, 1463–1497 (2010).
- 416 31. SJ Blundell, KM Blundell, *Concepts in thermal physics*. (OUP Oxford), (2009).
